# Supplementary material for: How are growth hormone and insulin-like growth factor-1 reported as markers for drug effectiveness in clinical acromegaly research? A comprehensive methodologic review
Source: Springer Nature journal article supplement (doi:10.1007/s11102-018-0884-4), 2018-03-31
Supplement: MOESM1 [file 15581534]

## Online Resource 1

---

How are growth hormone and insulin-like growth factor-1 reported as markers for drug effectiveness in clinical acromegaly research? A comprehensive methodologic review

Pituitary

Michiel J. van Esdonk, Eline J. M. van Zutphen, Ferdinand Roelfsema, Alberto M. Pereira, Piet H. van der Graaf, Nienke R. Biermasz, Jasper Stevens, Jacobus Burggraaf

### Corresponding author:

Michiel J. van Esdonk

[M.j.van.esdonk@lacdr.leidenuniv.nl](mailto:M.j.van.esdonk@lacdr.leidenuniv.nl)

Division of Systems Biomedicine and Pharmacology, Leiden Academic Centre for Drug Research, Leiden University, Leiden, The Netherlands.

Tel: +31 71 527 4284

---

### Full search term resulting in 263 abstracts – on 18-10-2017

(**Lanreotide** [tiab] OR Lanreotide [MeSH Terms] OR Somatuline [tiab] OR Somatulin [tiab] OR Somatulina [tiab]

OR **BIM 23014** [tiab] OR **BIM23014** [tiab] OR **angiopeptin** [tiab] OR **lanreotidum** [tiab] OR **lanreotida** [tiab]

OR **Octreotide** [MeSH Terms] OR Octreotide [tiab] OR Sandostatin [tiab] OR **Sandostatine** [tiab] OR **SMS 201-995** [tiab] OR **201-995** [tiab] OR **201995** [tiab] OR **MYCAPSSA** [tiab] OR **Octreolin** [tiab] OR **Octreotide-LAR** [tiab] OR **CAM2029** [tiab] OR **Longastatin** [tiab]

OR **Pasireotide** [tiab] OR Pasireotide [MeSH Terms] OR Signifor [tiab] OR **SOM230** [tiab] OR **SOM 230** [tiab] OR **SOM-230** [tiab] OR **SOM230B** [tiab]

OR **Bromocriptine** [MeSH Terms] OR Bromocriptine [tiab] OR Parlodel [tiab] OR Bromocriptin [tiab] OR Bromocryptin [tiab] OR Bromoergocriptine [tiab] OR Bromoergocryptine [tiab] OR Bromocriptina [tiab] OR Bromocriptinum [tiab] OR Ergoset [tiab] OR Bromergocryptine [tiab]

OR **Cabergoline** [tiab] OR Cabergoline [MeSH Terms] OR Dostinex [tiab] OR Cabaser, [tiab] OR Cabaseril, [tiab] OR FCE 21336 [tiab] OR FCE-2133 [tiab]

AND (Acromegaly [MeSH Terms] OR Acromegaly [tiab] OR Somatotropinoma [tiab] OR pituitary adenoma [MeSH Terms] OR pituitary adenoma [tiab])

NOT Prolactinoma [tiab]

NOT (Review [Publication Type] OR Case reports [Publication Type] )

AND ("2012/01/01"[Date - Publication] : "2018"[Date - Publication])
