# Supplementary material for: How are growth hormone and insulin-like growth factor-1 reported as markers for drug effectiveness in clinical acromegaly research? A comprehensive methodologic review
Source: Springer Nature journal article supplement (doi:10.1007/s11102-018-0884-4), 2018-03-31
Supplement: MOESM2 [file 15581534]

## Online Resource 2

---

How are growth hormone and insulin-like growth factor-1 reported as markers for drug effectiveness in clinical acromegaly research? A comprehensive methodologic review

Pituitary

Michiel J. van Esdonk, Eline J. M. van Zutphen, Ferdinand Roelfsema, Alberto M. Pereira, Piet H. van der Graaf, Nienke R. Biermasz, Jasper Stevens, Jacobus Burggraaf

**Corresponding author:**

Michiel J. van Esdonk

[M.j.van.esdonk@lacdr.leidenuniv.nl](mailto:M.j.van.esdonk@lacdr.leidenuniv.nl)

Division of Systems Biomedicine and Pharmacology, Leiden Academic Centre for Drug Research, Leiden University, Leiden, The Netherlands.

Tel: +31 71 527 4284

---

**Data extraction form – systemic review; An overview of study characteristics and method disclosure**

|                    |                                                                                                                               |
|--------------------|-------------------------------------------------------------------------------------------------------------------------------|
| Title              |                                                                                                                               |
| Authors            |                                                                                                                               |
| Year               |                                                                                                                               |
| Trial identifier   |                                                                                                                               |
| Study design       | Prospective/retrospective/cohort/case-control/RCT                                                                             |
| Study phase        | Phase 1/2/3 – Post approval                                                                                                   |
| Sample size        | Total number of subjects that were included in the study                                                                      |
| Compound           | Compounds used in the study                                                                                                   |
| Patient population | What population was studied                                                                                                   |
| Response criteria  | Biomarkers that were used to determine the effect:<br><br>A) GH<br>B) IGF-I<br>C) OGTT                                        |
| GH measurement     | Sampling design that was used to measure GH.<br><br>E.g. random 1-point GH measurement, 3-point mean with 30 minute interval. |

|                                  |                                                                                                                                   |
|----------------------------------|-----------------------------------------------------------------------------------------------------------------------------------|
|                                  |                                                                                                                                   |
| GH measurement time point        | Was the clock time, time after dose or fasting state of the subjects disclosed?                                                   |
| GH cut-off                       | GH concentration that was used to establish biochemical control                                                                   |
| IGF-1 measurement                | Sampling design that was used to measure IGF-1.<br>E.g. 1 sample, 2 samples                                                       |
| IGF-1 measurement time point     | Was the clock time, time after dose or fasting state disclosed?                                                                   |
| IGF-1 cut-off                    | IGF-1 concentration that was used to establish biochemical control                                                                |
| OGTT method                      | If OGTT results were included, was the method for the OGTT reported?<br>E.g. glucose dose, sampling frequency, cut-off for nadir. |
| PK                               | Was PK measured?                                                                                                                  |
| Number of PK samples per subject | Total blood samples taken from 1 individual                                                                                       |
| PK method                        | Method used to analyze the pharmacokinetic data                                                                                   |
| Statistics                       | Used summary statistics per biomarker.<br>E.g. Mean (SD); Median (IQR); Median (Range); ULN corrected IGF-1? Yes/No               |
| Assay used                       | Analytical assay used for GH and IGF-1 analysis, if reported.                                                                     |
