# Supplementary material for: How are growth hormone and insulin-like growth factor-1 reported as markers for drug effectiveness in clinical acromegaly research? A comprehensive methodologic review
Source: Springer Nature journal article supplement (doi:10.1007/s11102-018-0884-4), 2018-03-31
Supplement: MOESM3 [file 15581534]

## Online Resource 3

---

How are growth hormone and insulin-like growth factor-1 reported as markers for drug effectiveness in clinical acromegaly research? A comprehensive methodologic review

Pituitary

Michiel J. van Esdonk, Eline J. M. van Zutphen, Ferdinand Roelfsema, Alberto M. Pereira, Piet H. van der Graaf, Nienke R. Biermasz, Jasper Stevens, Jacobus Burggraaf

**Corresponding author:**

Michiel J. van Esdonk

[M.j.van.esdonk@lacdr.leidenuniv.nl](mailto:M.j.van.esdonk@lacdr.leidenuniv.nl)

Division of Systems Biomedicine and Pharmacology, Leiden Academic Centre for Drug Research, Leiden University, Leiden, The Netherlands.

Tel: +31 71 527 4284

---

| First Author     | Year | Title                                                                                                                                                                          | Number of patients at study completion | Study design                                  | Investigated drug(s)                                           | Patient population                                                                                                                                                                                         |
|------------------|------|--------------------------------------------------------------------------------------------------------------------------------------------------------------------------------|----------------------------------------|-----------------------------------------------|----------------------------------------------------------------|------------------------------------------------------------------------------------------------------------------------------------------------------------------------------------------------------------|
| Young Lee        | 2017 | The efficacy of medical treatment in patients with acromegaly in clinical practice.                                                                                            | 89                                     | Retrospective                                 | Cabergoline, Bromocriptine, Octreotide LAR, Lanreotide autogel | All patients in the database who were on medication for more than 3 months and began medical treatment after 2000.                                                                                         |
| Fahlbusch        | 2017 | Surgical debulking of pituitary adenomas improves responsiveness to octreotide lar in the treatment of acromegaly.                                                             | 38                                     | Randomized, multicenter                       | Octreotide LAR                                                 | Patients with at least one random GH $\geq$ 12.5 ng/ml and IGF-1 levels > 1x ULN.                                                                                                                          |
| Salvatori        | 2017 | A multicenter, observational study of lanreotide depot/autogel (LAN) in patients with acromegaly in the United States: 2-year experience from the SODA registry.               | 143                                    | Multicenter, open-label, observational        | Lanreotide autogel                                             | Patients treated with lanreotide autogel, who had no known sensitivity to SRLs.                                                                                                                            |
| Tahara           | 2017 | Efficacy and safety of long-acting pasireotide in Japanese patients with acromegaly or pituitary gigantism: results from a multicenter, open-label, randomized, phase 2 study. | 29                                     | Multicenter, open-label, randomized, phase II | Pasireotide LAR                                                | Patients who were medically naïve, GH nadir > 1 $\mu$ g/L, GH mean > 5 $\mu$ g/L with IGF-1 levels > 1x ULN or inadequately controlled patients with mean GH > 2.5 $\mu$ g/l, and IGF-1 levels > 1.3x ULN. |
| de Fátima Borges | 2017 | Treatment of acromegaly patients at the Federal University of Triângulo Mineiro(UFTM): Experience Report.                                                                      | 29                                     | Retrospective                                 | Octreotide, Octreotide LAR, Lanreotide, Cabergoline            | All patients in the database.                                                                                                                                                                              |

|              |      |                                                                                                                                                                     |     |                                                                 |                                                              |                                                                                                                                                                              |
|--------------|------|---------------------------------------------------------------------------------------------------------------------------------------------------------------------|-----|-----------------------------------------------------------------|--------------------------------------------------------------|------------------------------------------------------------------------------------------------------------------------------------------------------------------------------|
| Giustina     | 2017 | High-Dose and High-Frequency Lanreotide Autogel in Acromegaly: A Randomized, Multicenter Study.                                                                     | 29  | Prospective, multicenter, randomized, open-label                | Lanreotide autogel                                           | Patients with active acromegaly, receiving octreotide LAR or lanreotide autogel with GH levels $\geq 1 \mu\text{g/L}$ and/or IGF-1 levels of $> 1.2\text{x ULN}$ .           |
| Casagrande   | 2017 | Remission of acromegaly after treatment withdrawal in patients controlled by cabergoline alone or in combination with octreotide: results from a multicenter study. | 16  | Prospective, multicenter                                        | Withdrawal after cabergoline or combined with octreotide LAR | Patients controlled by combination therapy with octreotide LAR and cabergoline or cabergoline alone (IGF-1 $< 1\text{x ULN}$ ).                                              |
| Kasuki       | 2016 | Experience with pegvisomant treatment in acromegaly in a single Brazilian tertiary reference center: efficacy, safety and predictors of response.                   | 27  | Retrospective                                                   | Pegvisomant, Octreotide LAR, Cabergoline                     | Patients who were treated with pegvisomant for at least three months.                                                                                                        |
| Khairi       | 2017 | Clinical Outcomes and Self-Reported Symptoms in Patients With Acromegaly: an 8-Year Follow-Up of a Lanreotide Study                                                 | 6   | Longitudinal follow-up                                          | Lanreotide, Cabergoline, Pegvisomant                         | Patients who were originally enrolled in the Massachusetts General Hospital site of SALSA.                                                                                   |
| Puig-Domingo | 2016 | Use of lanreotide in combination with cabergoline or pegvisomant in patients with acromegaly in the clinical practice: The ACROCOMB study.                          | 108 | Retrospective, multicenter, observational                       | Lanreotide autogel, Cabergoline, Pegvisomant                 | Patients with active acromegaly, treated with lanreotide and cabergoline or pegvisomant when treatment with a single agent did not give adequate control.                    |
| Gheorghiu    | 2016 | Beneficial effect of dose escalation and surgical debulking in patients with acromegaly treated with somatostatin analogs in a Romanian tertiary care center.       | 73  | Retrospective                                                   | Octreotide LAR, Lanreotide SR                                | Patients treated with somatostatin analogs.                                                                                                                                  |
| Casagrande   | 2017 | Long-Term Remission of Acromegaly after Octreotide Withdrawal Is an Uncommon and Frequently Unsustainable Event.                                                    | 58  | Prospective, multicenter                                        | Withdrawal from octreotide LAR                               | Patients with octreotide LAR for $\geq 24$ months, dose, and dose interval unchanged in the last 12 months, mean IGF-1 $\leq 1\text{x ULN}$ and IGF-1 $\leq 1\text{x ULN}$ . |
| Sagvand      | 2016 | Monotherapy with lanreotide depot for acromegaly: long-term clinical experience in a pituitary center.                                                              | 63  | Retrospective, longitudinal, case-control                       | Lanreotide depot                                             | Patients receiving lanreotide depot monotherapy continuously for at least 24 months, or surgically cured control patients.                                                   |
| Chang        | 2016 | Serial follow-up of presurgical treatment using pasireotide long-acting release with or without octreotide long-acting release for naïve active acromegaly.         | 7   | Prospective, multicenter, randomized, double-blind Phase III    | Pasireotide LAR, Octreotide LAR                              | Patients with naïve active acromegaly, GH $> 5 \mu\text{g/L}$ and IGF-1 levels $> 1\text{x ULN}$ .                                                                           |
| Bronstein    | 2016 | Switching patients with acromegaly from octreotide to pasireotide improves biochemical control: crossover extension to a randomized, double-blind, Phase III study. | 119 | Double-blind, 12 month crossover extension of a phase III trial | Pasireotide LAR, Octreotide LAR                              | Patients with inadequate biochemical control (GH $\geq 2.5 \mu\text{g/L}$ and/or IGF-1 $> \text{ULN}$ ) at the end of core study.                                            |
| Schmid       | 2016 | Effect of pasireotide on glucose- and growth hormone-related biomarkers in patients with inadequately controlled acromegaly.                                        | 198 | Prospective, multicenter, randomized,                           | Pasireotide LAR, Octreotide LAR, Lanreotide LAR              | Patients with GH $> 2.5 \mu\text{g/L}$ and IGF-1 levels $> 1.3\text{x ULN}$ with octreotide or lanreotide as monotherapy for 6 months or longer.                             |

|           |      |                                                                                                                                                                                                             |     |                                                                        |                                                               |                                                                                                                                                                                                     |
|-----------|------|-------------------------------------------------------------------------------------------------------------------------------------------------------------------------------------------------------------|-----|------------------------------------------------------------------------|---------------------------------------------------------------|-----------------------------------------------------------------------------------------------------------------------------------------------------------------------------------------------------|
|           |      |                                                                                                                                                                                                             |     | parallel-group, phase III                                              |                                                               |                                                                                                                                                                                                     |
| Neggens   | 2015 | Lanreotide Autogel 120 mg at extended dosing intervals in patients with acromegaly biochemically controlled with octreotide LAR: the LEAD study.                                                            | 107 | Prospective, open-label, non-comparative                               | Lanreotide autogel, bromocriptine, cabergoline                | Patients had treatment with octreotide LAR and had stable doses for $\geq 6$ months or 4 months when concomitant dopamine agonist therapy was used.                                                 |
| Shimon    | 2015 | Giant GH-secreting pituitary adenomas: management of rare and aggressive pituitary tumors.                                                                                                                  | 34  | Retrospective, multicenter                                             | Octreotide LAR, Lanreotide Autogel, Cabergoline, Pegvisomant  | Patients with giant adenomas (adenoma size $\geq 40$ mm).                                                                                                                                           |
| Melmed    | 2015 | Safety and efficacy of oral octreotide in acromegaly: results of a multicenter phase III trial.                                                                                                             | 82  | Multicenter, open-label, dose-titration, baseline-controlled phase III | Oral octreotide capsules                                      | Patients had active acromegaly, with a stable dose of SRLs for at least 3 months. Patients showed a complete or partial response to SRLs, defined as IGF-1 $< 1.3 \times$ ULN and GH $< 2.5$ ng/ml. |
| Vandeva   | 2015 | Treatment outcome results from the Bulgarian Acromegaly Database: adjuvant dopamine agonist therapy is efficient in less than one fifth of non-irradiated patients.                                         | 534 | Retrospective                                                          | Bromocriptine, cabergoline, octreotide LAR, pegvisomant       | All patients with at least one relevant medical record.                                                                                                                                             |
| Evran     | 2014 | Clinical experiences and success rates of acromegaly treatment: the single center results of 62 patients.                                                                                                   | 62  | Retrospective                                                          | Octreotide LAR and lanreotide                                 | All patients in the database.                                                                                                                                                                       |
| Hatipoglu | 2015 | Discontinuation of somatostatin analogs while acromegaly is in long-term remission.                                                                                                                         | 16  | Prospective                                                            | Withdrawal from somatostatin analogs (octreotide, lanreotide) | Patients with stable doses of somatostatin analogs for at least 2 years and in remission (IGF-1 $< 1 \times$ ULN and GH $< 1$ ng/ml) for at least 2 years.                                          |
| Gadelha   | 2014 | Pasireotide versus continued treatment with octreotide or lanreotide in patients with inadequately controlled acromegaly (PAOLA): a randomised, phase 3 trial.                                              | 181 | Prospective, multicenter, randomized, parallel-group, phase III        | Pasireotide LAR, octreotide, lanreotide                       | Patients with GH $> 2.5$ $\mu$ g/L and IGF-1 levels $> 1.3 \times$ ULN with octreotide or lanreotide as monotherapy for 6 months or longer.                                                         |
| Sheppard  | 2015 | Pasireotide LAR maintains inhibition of GH and IGF-1 in patients with acromegaly for up to 25 months: results from the blinded extension phase of a randomized, double-blind, multicenter, Phase III study. | 120 | Double-blind, multicenter, extension of a phase III study              | Pasireotide LAR, Octreotide LAR                               | Patients with GH $< 2.5$ $\mu$ g/L and IGF-1 levels $< 1 \times$ ULN at the end of the phase III study were eligible to continue receiving their randomized therapy.                                |
| Fougner   | 2014 | Preoperative octreotide treatment of acromegaly: long-term results of a randomised controlled trial.                                                                                                        | 62  | Prospective, randomized, multicenter                                   | Octreotide LAR                                                | Patients were newly diagnosed.                                                                                                                                                                      |
| Petersenn | 2014 | Pharmacokinetics, pharmacodynamics, and safety of pasireotide LAR in patients with acromegaly: a randomized, multicenter, open-label, phase I study.                                                        | 35  | Randomized, multicenter, open-label, phase I                           | Pasireotide LAR                                               | Patients with IGF-1 levels $> 1 \times$ ULN and GH nadir $\geq 1$ $\mu$ g/L or mean GH level $> 5$ $\mu$ g/l.                                                                                       |

|                          |      |                                                                                                                                                                                                                        |      |                                                               |                                                                                        |                                                                                                                                                                                                                                                                                                 |
|--------------------------|------|------------------------------------------------------------------------------------------------------------------------------------------------------------------------------------------------------------------------|------|---------------------------------------------------------------|----------------------------------------------------------------------------------------|-------------------------------------------------------------------------------------------------------------------------------------------------------------------------------------------------------------------------------------------------------------------------------------------------|
| Espinosa-de-los-Monteros | 2015 | Octreotide LAR treatment of acromegaly in "real life": long-term outcome at a tertiary care center.                                                                                                                    | 157  | Retrospective                                                 | Octreotide LAR                                                                         | Patients who had not received radiotherapy or concomitant treatment with cabergoline.                                                                                                                                                                                                           |
| Colao                    | 2014 | Pasireotide versus octreotide in acromegaly: a head-to-head superiority study.                                                                                                                                         | 358  | Prospective, randomized, double-blind, multicenter            | Pasireotide LAR, octreotide LAR                                                        | Patients were treatment naïve de novo or after surgery, with GH > 5 µg/L or GH nadir ≥ 1µg/L and IGF above the ULN.                                                                                                                                                                             |
| Caron                    | 2014 | Tumor shrinkage with lanreotide Autogel 120 mg as primary therapy in acromegaly: results of a prospective multicenter clinical trial.                                                                                  | 64   | Prospective, open label, single arm, multicenter, phase IIIb  | Lanreotide autogel                                                                     | Patients were treatment naïve with GH secreting macroadenomas, GH mean or nadir > 1 µg/l and IGF-1 levels above ULN.                                                                                                                                                                            |
| Vilar                    | 2014 | Can we predict long-term remission after somatostatin analog withdrawal in patients with acromegaly? Results from a multicenter prospective trial.                                                                     | 20   | Prospective, multicenter                                      | Withdrawal from octreotide LAR                                                         | Patients with two or more years of treatment with octreotide LAR, a stable dose and injection interval every 4 weeks or longer, GH levels < 2.5 ng/ml and normal IGF-1 levels for age, tumor remnant < 10 mm, no radiotherapy and no cabergoline or pegvisomant use over the previous 6 months. |
| Dias                     | 2013 | Acromegaly and pregnancy: a prospective study.                                                                                                                                                                         | 8    | Prospective, interventional, multicenter                      | Withdrawal of octreotide and cabergoline during pregnancy                              | Pregnant patients with active acromegaly, high level of IGF-1, before pregnancy and available MRI image.                                                                                                                                                                                        |
| Mangupli                 | 2014 | Biochemical and quality of life responses to octreotide-LAR in acromegaly.                                                                                                                                             | 28   | Retrospective observational                                   | Octreotide LAR                                                                         | Patients were selected because they had completed at least two quality of life questionnaires.                                                                                                                                                                                                  |
| Chieffo                  | 2013 | Efficacy and safety of an octreotide implant in the treatment of patients with acromegaly.                                                                                                                             | 163  | Randomized, multicenter, international, open-label, phase III | Octreotide LAR, octreotide implant                                                     | Patients with serum IGF-1 > 1.2x ULN, GH nadir ≥ 1.0 ng/ml or confirmation of a GH secreting tumor on pathologic examination of surgically removed tissue, with demonstrated responsiveness to octreotide treatment.                                                                            |
| Howlett                  | 2013 | Control of growth hormone and IGF1 in patients with acromegaly in the UK: responses to medical treatment with somatostatin analogues and dopamine agonists.                                                            | 2572 | Retrospective database analysis of the UK Acromegaly Register | Somatostatin analogues, dopamine agonists and/or GH antagonist. Not further specified. | All patients in the database.                                                                                                                                                                                                                                                                   |
| Sanyal                   | 2012 | Outcome in acromegaly: A retrospective analysis.                                                                                                                                                                       | 15   | Retrospective                                                 | Cabergoline                                                                            | All patients in the database.                                                                                                                                                                                                                                                                   |
| Petersenn                | 2014 | Long-term efficacy and safety of subcutaneous pasireotide in acromegaly: results from an open-ended, multicenter, Phase II extension study.                                                                            | 30   | Open-label, open-ended, multicenter extension                 | Pasireotide                                                                            | Patients with GH ≤ 2.5 µg/L and normal IGF-1 or that showed clinically relevant improved in the core study.                                                                                                                                                                                     |
| Annamalai                | 2013 | A comprehensive study of clinical, biochemical, radiological, vascular, cardiac, and sleep parameters in an unselected cohort of patients with acromegaly undergoing presurgical somatostatin receptor ligand therapy. | 30   | Prospective                                                   | Lanreotide autogel                                                                     | Newly diagnosed, untreated, GH nadir < 0.4 µg/L and IGF-1 > 1x ULN.                                                                                                                                                                                                                             |

|              |      |                                                                                                                                                                                                |     |                                                                                                                                |                                              |                                                                                                                                                                                                                                                                                                                                          |
|--------------|------|------------------------------------------------------------------------------------------------------------------------------------------------------------------------------------------------|-----|--------------------------------------------------------------------------------------------------------------------------------|----------------------------------------------|------------------------------------------------------------------------------------------------------------------------------------------------------------------------------------------------------------------------------------------------------------------------------------------------------------------------------------------|
| Shimatsu     | 2013 | Efficacy, safety, and pharmacokinetics of sustained-release lanreotide (lanreotide Autogel) in Japanese patients with acromegaly or pituitary gigantism.                                       | 59  | Multicenter, open-label, randomized, parallel-group phase II and an open-label, dose-adjustment, long-term treatment III study | Lanreotide autogel                           | Patients with active acromegaly with mean serum GH levels > 2.8 ng/ml or > 2.5 ng/ml.                                                                                                                                                                                                                                                    |
| Salvatori    | 2014 | Lanreotide extended-release aqueous-gel formulation, injected by patient, partner or healthcare provider in patients with acromegaly in the United States: 1-year data from the SODA registry. | 87  | Multicenter observational                                                                                                      | Lanreotide depot                             | Acromegaly patients who are treated with lanreotide depot.                                                                                                                                                                                                                                                                               |
| Suda         | 2013 | Efficacy of combined octreotide and cabergoline treatment in patients with acromegaly: a retrospective clinical study and review of the literature.                                            | 10  | Retrospective                                                                                                                  | Octreotide LAR, cabergoline                  | Patients who were treated with octreotide LAR monotherapy for more than 8 months and showed octreotide-resistance.                                                                                                                                                                                                                       |
| Velija-Asimi | 2012 | The efficacy of octreotide LAR in acromegalic patients as primary or secondary therapy.                                                                                                        | 10  | Retrospective                                                                                                                  | Octreotide LAR                               | Patients with active acromegaly.                                                                                                                                                                                                                                                                                                         |
| Demir        | 2012 | Improvement in remission rates of the first operation in acromegalic patients.                                                                                                                 | 180 | Retrospective                                                                                                                  | Octreotide                                   | Patients undergone transnasal transsphenoidal adenectomy at least once.                                                                                                                                                                                                                                                                  |
| Gadelha      | 2012 | A subcutaneous octreotide hydrogel implant for the treatment of acromegaly.                                                                                                                    | 45  | Two open-label, randomized, multicenter, phase II studies                                                                      | Hydrated and nonhydrated octreotide implants | Patients with IGF-1 > 1.3x ULN, GH nadir > 1.0 ng/ml with responsiveness to octreotide.<br>Patients with IGF-1 > 1.2x ULN, GH nadir > 1.0 ng/ml, complete or partial responsiveness to a somatostatin analog.                                                                                                                            |
| Li           | 2012 | Preoperative lanreotide treatment improves outcome in patients with acromegaly resulting from invasive pituitary macroadenoma.                                                                 | 49  | Prospective, randomized                                                                                                        | Lanreotide                                   | Newly diagnosed, untreated, GH nadir > 2.5 µg/L, IGF-1 > 1.3x ULN patients with an invasive pituitary macroadenoma.                                                                                                                                                                                                                      |
| Bernabeu     | 2013 | Pegvisomant and cabergoline combination therapy in acromegaly.                                                                                                                                 | 14  | Observational, retrospective, cross-sectional study at 5 tertiary hospitals                                                    | Pegvisomant, cabergoline                     | All patients showed a partial response to maximum doses of long-acting SRL therapy, with IGF-1 > 1.2x ULN after a minimum of 6 months of treatment. Before the advent of PEG, some patients had received prolonged treatment with SRL despite showing only a partial response. After SRL therapy, all cases had been on PEG monotherapy. |
| Higham       | 2012 | Effective combination treatment with cabergoline and low-dose pegvisomant in active acromegaly: a prospective clinical trial.                                                                  | 19  | A United Kingdom, five-center, open-label, prospective clinical trial                                                          | Pegvisomant, cabergoline                     | Patients with or without transsphenoidal surgery, with or without radiotherapy, with or without prior medical therapy, with different numbers of pituitary deficiencies.                                                                                                                                                                 |
| Ramírez      | 2012 | Discontinuation of octreotide LAR after long term, successful treatment of patients with acromegaly: is it worth trying?                                                                       | 12  | Prospective                                                                                                                    | Withdrawal from octreotide LAR               | Patients on octreotide LAR with 2 or more years of treatment, on a stable dose and injection interval of 20 mg every 8 weeks or longer for the previous year, no history of radiation, no cabergoline for the previous 6 months, a GH < 1.5 ng/ml, and an IGF1 < 1.2x ULN.                                                               |

|         |      |                                                                                                                   |     |                                   |                                                    |                                                                                                           |
|---------|------|-------------------------------------------------------------------------------------------------------------------|-----|-----------------------------------|----------------------------------------------------|-----------------------------------------------------------------------------------------------------------|
| Tutuncu | 2012 | Comparison of octreotide LAR and lanreotide autogel as post-operative medical treatment in acromegaly.            | 68  | Retrospective                     | Octreotide long acting release, lanreotide autogel | Patients not cured by transsphenoidal endoscopic or microscopic pituitary surgery.                        |
| Garrido | 2012 | Pharmacodynamic modeling of the effects of lanreotide Autogel on growth hormone and insulin-like growth factor 1. | 104 | Phase II, multicenter, randomized | Lanreotide autogel                                 | Patients previously treated or not by surgery, radiotherapy, somatostatin analogues or dopamine agonists. |
