# Supplementary material for: How are growth hormone and insulin-like growth factor-1 reported as markers for drug effectiveness in clinical acromegaly research? A comprehensive methodologic review
Source: Springer Nature journal article supplement (doi:10.1007/s11102-018-0884-4), 2018-03-31
Supplement: MOESM4 [file 15581534]

## Online Resource 4

---

How are growth hormone and insulin-like growth factor-1 reported as markers for drug effectiveness in clinical acromegaly research? A comprehensive methodologic review

Pituitary

Michiel J. van Esdonk, Eline J. M. van Zutphen, Ferdinand Roelfsema, Alberto M. Pereira, Piet H. van der Graaf, Nienke R. Biermasz, Jasper Stevens, Jacobus Burggraaf

### Corresponding author:

Michiel J. van Esdonk

[M.j.van.esdonk@lacdr.leidenuniv.nl](mailto:M.j.van.esdonk@lacdr.leidenuniv.nl)

Division of Systems Biomedicine and Pharmacology, Leiden Academic Centre for Drug Research, Leiden University, Leiden, The Netherlands.

Tel: +31 71 527 4284

---

### Checklist for reporting of acromegaly studies:

#### 1. Insulin-like growth factor 1

- Report method of sampling (single, fasting, mean of multiple samples).
- Report IGF-1 assay, preferably including the international reference standard.
  - Handling of data obtained from 2 or more different assays.
- Report criteria for biochemical control, cut-off for IGF-1?
- Report ULN corrected IGF-1 levels.
- Report % biochemical control and 95%-CI using the pre-defined criteria.
- Report ULN corrected mean  $\pm$  SD (or median [IQR] if non-normal distribution) of pre-defined subgroups.
- Report % change from baseline with mean  $\pm$  SD (or median [IQR] if non-normal distribution).
  - Individual baseline and measurements as supplemental material.
    - With an individual's age and gender when IGF-1 concentrations are given

#### 2. Growth hormone

- Report method of sampling (random, fasting, mean of multiple samples with interval).
- Report GH assay, preferably including the international reference standard.
  - Handling of data obtained from 2 or more different assays.
- Report criteria for biochemical control, cut-off for GH, if any.
- Report % biochemical control and 95%-CI using the pre-defined criteria.
- Report GH mean  $\pm$  SD (or median [IQR] if non-normal distribution) of pre-defined subgroups.
- Report % change from baseline with mean  $\pm$  SD (or median [IQR] if non-normal distribution).
  - Individual baseline and measurements as supplemental material.

### 3. Oral glucose tolerance test

- Report method of sampling and glucose dose.
- Report GH assay, preferably including the international reference standard.
  - Handling of data obtained from 2 or more different assays.
- Report GH cut-off for nadir to assess biochemical control, if any.
- Report % biochemical control and 95%-CI using the pre-defined criteria.
- Report GH nadir mean  $\pm$  SD (or median [IQR] if non-normal distribution) of pre-defined subgroups.
- Report % change from baseline with mean  $\pm$  SD (or median [IQR] if non-normal distribution).
  - Individual baseline and measurements as supplemental material.

### 4. Pharmacokinetics

- Report number of samples and time after dosing.
- Report individual profiles or mean  $\pm$  95%-CI to show the inter-individual variability.
- Report summary and individual statistics from a NCA ( $C_{max}$ ,  $t_{max}$ , AUC,  $t_{1/2}$ ) or, preferably, perform a more advanced statistical analysis (population PK/PD modeling).
- Link the individual PK to individual response (e.g. linear/non-linear regression of AUC versus  $\Delta$ IGF-1).
- Search for and report covariates that explain the inter-individual variability in the PK.
